# Supplementary material
Source: HighWire-hosted journal article supplement (https://jcp.bmj.com/content/75/12/844)
Supplement: inline-supplementary-material-1 [file inline-supplementary-material-1.pdf]

**Supplemental Figure 1**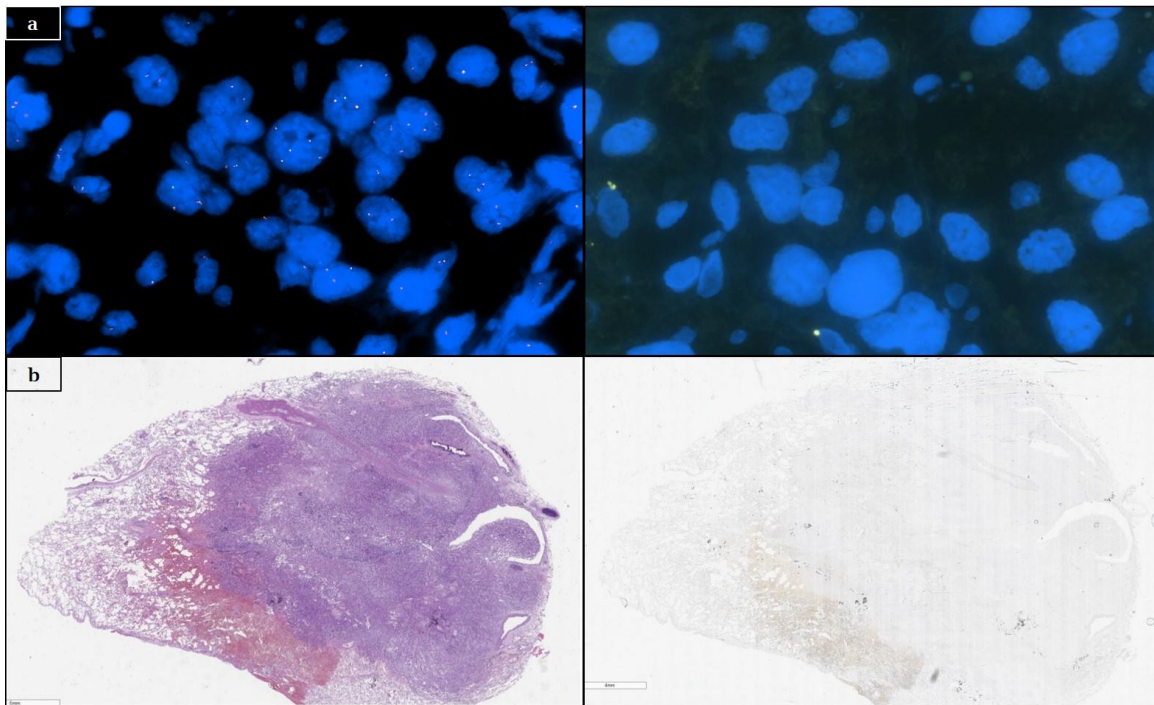

**Supplemental Figure 1.** A representative sample of NSCLC (case 1): **a)** ALK FISH before (left) and after (right) exposure to light for 24 hours. **b)** HE staining before (left) and after (right) discoloration procedure. Scale bar 4 mm.

**Supplemental Figure 2**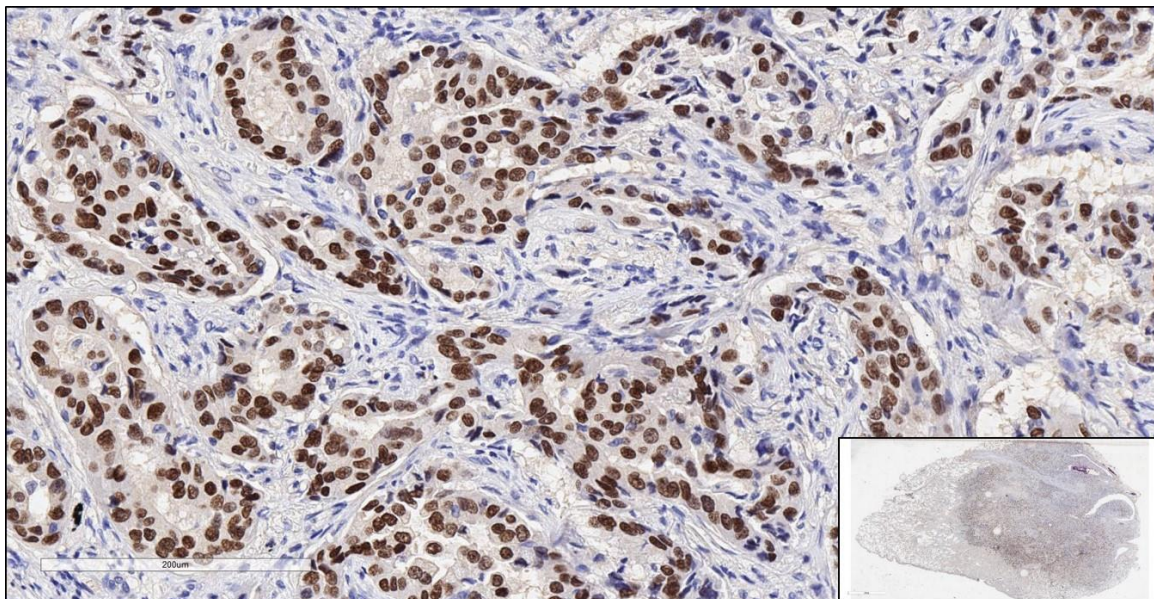

**Supplemental Figure 2.** A representative sample of NSCLC (case 1) showing a nuclear TTF1 strong positivity. Scale bar 200  $\mu$ m.
